# 1 High-resolution mapping and characterization of epitopes in 2 COVID-19 patients

3 Winston A. Haynes<sup>1,†</sup>, Kathy Kamath<sup>1,†</sup>, Joel Bozekowski<sup>1,†</sup>, Elisabeth Baum-Jones<sup>1</sup>, Melissa  
4 Campbell<sup>2</sup>, Arnau Casanovas-Massana<sup>3</sup>, Patrick S. Daugherty<sup>1</sup>, Charles S. Dela Cruz<sup>4</sup>,  
5 Abhilash Dhal<sup>1</sup>, Shelli F. Farhadian<sup>5</sup>, Lynn Fitzgibbons<sup>6</sup>, John Fournier<sup>3,5</sup>, Michael Jhatro<sup>1</sup>,  
6 Gregory Jordan<sup>1</sup>, Debra Kessler<sup>7</sup>, Jon Klein<sup>8</sup>, Carolina Lucas<sup>8</sup>, Larry L. Luchsinger<sup>7</sup>, Brian  
7 Martinez<sup>1</sup>, Mary C. Muenker<sup>3</sup>, Lauren Pischel<sup>3,5</sup>, Jack Reifert<sup>1</sup>, Jaymie R. Sawyer<sup>1</sup>, Rebecca  
8 Waitz<sup>1</sup>, Elsie A. Wunder Jr.<sup>3</sup>, Minlu Zhang<sup>1</sup>, Yale IMPACT Team, Akiko Iwasaki<sup>8,9</sup>, Albert I. Ko<sup>3,5</sup>,  
9 John C. Shon<sup>1,\*</sup>

10

11 <sup>1</sup> Serimmune, Inc., Goleta, CA, USA

12 <sup>2</sup> Department of Pediatrics, Section of Pediatric Infectious Diseases, Yale School of Medicine,  
13 New Haven, CT, USA

14 <sup>3</sup> Department of Epidemiology of Microbial Diseases, Yale School of Public Health, New Haven,  
15 CT, USA

16 <sup>4</sup> Department of Medicine, Section of Pulmonary, Critical Care and Sleep Medicine, Yale School  
17 of Medicine, New Haven, CT, USA

18 <sup>5</sup> Department of Medicine, Section of Infectious Diseases, Yale School of Medicine, New Haven,  
19 CT, USA

20 <sup>6</sup> Santa Barbara Cottage Hospital, Santa Barbara, CA, USA

21 <sup>7</sup> New York Blood Center, New York, NY, USA

22 <sup>8</sup> Department of Immunobiology, Yale School of Medicine, New Haven, CT, USA

23 <sup>9</sup> Howard Hughes Medical Institute, Chevy Chase, MD, USA

24 <sup>†</sup> These authors contributed equally

25 <sup>\*</sup> Correspondence to: [john.shon@serimmune.com](mailto:john.shon@serimmune.com)

26 Members of the Yale IMPACT Team:

27 Kelly Anastasio, Michael H. Askenase, Maria Batsu, Santos Bermejo, Kristina Brower, Molly L.

28 Bucklin, Staci Cahill, Yiyun Cao, Rupak Datta, Giuseppe Deluliis, Rebecca Earnest, Bertie

29 Geng, Ryan Handoko, William Khoury-Hanold, Lynda Knaggs, Maxine Kuang, Sarah Lapidus,

30 Anjelica Martin, Irene Matos, David McDonald, Maksym Minasyan, Adam J. Moore, Nida

31 Naushad, Allison Nelson, Jessica Nouws, Angela Nunez, Hong-Jai Park, Xiaohua Peng, Tyler

32 Rice, Kadi-Ann Rose, Wade Schulz, Lorenzo Sewanan, Lokesh Sharma, Denise Shepard,

33 Michael Simonov, Mikhail Smolgovsky, Nicole Sonnert, Ariktha Srivathsan, Yvette

34 Strong, Codruta Todeasa, Jordan Valdez, Sofia Velazquez, Pavithra Vijayakumar, Elizabeth B.

35 White

36

## 37 **Abstract**

38 Fine scale delineation of epitopes recognized by the antibody response to SARS-CoV-2

39 infection will be critical to understanding disease heterogeneity and informing development of

40 safe and effective vaccines and therapeutics. The Serum Epitope Repertoire Analysis (SERA)

41 platform leverages a high diversity random bacterial display library to identify epitope binding

42 specificities with single amino acid resolution. We applied SERA broadly, across human, viral

43 and viral strain proteomes in multiple cohorts with a wide range of outcomes from SARS-CoV-2

44 infection. We identify dominant epitope motifs and profiles which effectively classify COVID-19,

45 distinguish mild from severe disease, and relate to neutralization activity. We identify a

46 repertoire of epitopes shared by SARS-CoV-2 and endemic human coronaviruses and

47 determine that a region of amino acid sequence identity shared by the SARS-CoV-2 furin

48 cleavage site and the host protein ENaC-alpha is a potential cross-reactive epitope. Finally, we

49 observe decreased epitope signal for mutant strains which points to reduced antibody response

50 to mutant SARS-CoV-2. Together, these findings indicate that SERA enables high resolution of

51 antibody epitopes that can inform data-driven design and target selection for COVID-19  
52 diagnostics, therapeutics and vaccines.

53

## 54 **Introduction**

55 The novel coronavirus SARS-CoV-2 global pandemic has affected millions of people  
56 world-wide and led to a major healthcare crisis. Considerable research has gone into  
57 understanding the myriad symptoms that are seen in patients as well as the stark contrast  
58 between the large number of mild or asymptomatic cases and the staggering death toll around  
59 the world<sup>1-5</sup>. Determining the factors that contribute to different disease manifestations, severity  
60 and immunity is critical to adequate therapeutic intervention, improved patient outcomes, and  
61 vaccine design.

62 One avenue that is being extensively explored is the degree to which an immune  
63 response to the virus protects, or harms, an individual. Although it is possible that a pre-existing  
64 exposure to common coronaviruses may have a protective role during SARS-CoV-2 infection<sup>6,7</sup>,  
65 it has also been proposed that antibodies to SARS-CoV-2 may sometimes be directly  
66 pathogenic or lead to the generation of auto-reactive antibodies<sup>8-12</sup>. With millions of cases  
67 extant, and based on current trends, millions more in the coming months, it is critical that  
68 patients be accurately assessed not just for infection but also for the potential of severe disease  
69 progression, allowing timely application of treatments for best outcomes. Of considerable  
70 concern as well is the specter of a combined SARS-CoV-2/influenza season with the need to  
71 rapidly differentiate between multiple viral infections<sup>13,14</sup>. In addition, a growing number of  
72 COVID-19 patients who had expected to fully recover have not, with symptoms that linger far  
73 past the expected recovery period and cause significant disruption to their lives as well as an  
74 extended need for healthcare. The number of “long-haulers” is not currently clear but the need  
75 to elucidate the role of a disrupted immune system in their illness is pressing<sup>15-17</sup>.

76 Of paramount urgency is the development of a vaccine against SAR-CoV-2. Along with  
77 the initial step of defining an effective vaccine for the immediate crisis, factors such as viral  
78 mutation rate and the uncertainty of long-term immunity could play a large role in ongoing  
79 management. It is unclear if it will be possible to develop “sterilizing immunity” to the virus, thus  
80 preventing infection completely<sup>18–20</sup>. A yearly “flu-type” immunization would necessitate  
81 continued surveillance of both viral evolution and patients’ yearly immune responses to keep  
82 transmission and mortality to a minimum<sup>21</sup>.

83 Many different groups have examined antibody responses to SARS-CoV-2, exploring  
84 correlation with disease severity, duration of humoral response, and the neutralizing capacity of  
85 response<sup>3,22,23</sup>. Most of these methods have been limited to quantitative assessment of humoral  
86 response to whole proteins or large domains of spike and nucleoprotein. Peptide and phage  
87 display libraries have also been used to capture higher resolution epitope patterns associated  
88 with disease but are limited to characterization of linear epitope signal and in their ability to  
89 make clinical seropositivity assessments<sup>4,24,25</sup>. We present in this paper the application of Serum  
90 Epitope Repertoire Analysis (SERA), a high throughput, random bacterial peptide display  
91 technology that enables assessment of SARS-CoV-2 seropositivity and high-resolution mapping  
92 of epitopes across any arbitrary proteome, including wild-type SARS-CoV-2, its mutant strains,  
93 common coronaviruses, and the human proteome.

94 We have leveraged over 2,000 pre-pandemic immune repertoires and over 500 COVID-  
95 19 cases to identify the antigens and epitopes that elicit a SARS-CoV-2 humoral response. We  
96 show that while antibody profiles of individuals are heterogeneous, epitope-level resolution  
97 enables a range of analyses and visualizations, from the earliest epitopes to elicit an antibody  
98 response, to putative mapping of structural epitopes that may be important for neutralization or  
99 immunity. Combining epitope motifs into a panel yields a diagnostic classifier that distinguished  
100 NAT+ cases from controls with accuracy comparable to serological tests in current use.  
101 Differences in the quantity and quality of epitopes in mild versus moderate and severe disease

102 can be seen at sites of biological and clinical interest. *In silico* analysis of epitope repertoires on  
103 wild-type and mutant SARS-CoV-2 proteins suggests that some mutations may result in loss of  
104 antibody reactivity to mutant SARS-CoV-2 infections while analysis against the human  
105 proteome identified SARS-CoV-2 antibodies that may cross-react with human proteins and  
106 contribute to disease pathogenesis. These capabilities are all possible through informatics  
107 analysis of a single assay that requires a minimal amount of serum from each subject.

108

## 109 **Results**

### 110 *SERA screening of COVID-19 serum*

111 We applied SERA to discover and validate SARS-CoV-2 antigens and epitopes across  
112 the complete viral proteome from 779 COVID-19 serum samples taken from multiple cohorts of  
113 individuals with recent or past SARS-CoV-2 infection, which in total include 579 unique subjects  
114 (Table 1). We additionally leverage a large database of 1997 pre-pandemic controls. The  
115 majority of the subjects were confirmed SARS-CoV-2 positive by nucleic acid testing (NAT). For  
116 Cohorts I, II, and III, extensive characterization was available for covariates that included  
117 disease severity, date of symptom onset, and in many cases, serological testing (Supplemental  
118 Table 1).

119 Patient samples were all screened using the previously published SERA assay, which  
120 enables high throughput characterization of antibody epitopes (Figure 1)<sup>26,27</sup>. In brief, serum or  
121 plasma is incubated with the randomized bacterial display peptide library; antibodies bind to  
122 peptides that mimic their natural epitopes and are then separated from unbound library  
123 members using affinity-coupled magnetic beads. The resulting bacterial pools are grown  
124 overnight, plasmids encoding the antibody-binding peptides are purified, and the peptide-  
125 encoding regions are PCR amplified and barcoded with well-specific PCR indices. Ninety-four  
126 samples are normalized, pooled together and sequenced via next-generation sequencing

127 (NGS). The output of SERA is a set of approximately 1 million peptide sequences for each  
128 individual, representing their unique epitope repertoire. After SERA screening, we applied two  
129 complementary discovery tools, IMUNE and PIWAS, to identify antigens and epitopes involved  
130 in the SARS-CoV-2 immune response (Figure 1).

131

### 132 *Characterization of SARS-CoV-2 proteome antigens and epitopes*

133 To establish an understanding of relevant SARS-CoV-2 antigens and epitopes, we  
134 analyzed the SARS-CoV-2 proteome with protein-based immunome wide association studies  
135 (PIWAS). Briefly, PIWAS identifies epitope signal in the context of an arbitrary proteome by tiling  
136 and smoothing kmer sequences across the entire proteome<sup>28</sup>. PIWAS derives power at both the  
137 cohort and single sample level through statistical comparisons to a large database of pre-  
138 pandemic controls. Using the reference SARS-CoV-2 proteome from Uniprot, we performed  
139 PIWAS of 579 COVID-19 samples compared to 497 pre-pandemic controls, with 1500 additional  
140 pre-pandemic controls serving as a normalization cohort. In addition to the established antigens  
141 spike and nucleocapsid, we observed highly significant signals for protein 3a, non-structural  
142 protein 8 (NSP-8), membrane protein, and replicase polyprotein 1ab (Figure 2A). We further  
143 examined epitope-level signal for the top IgG and IgM antigens identified by PIWAS (Figure 2B).  
144 Within spike and nucleoprotein, we observed multiple epitopes that are conserved across a  
145 large portion of the COVID-19 patient population. In contrast, epitope signals for protein 3a,  
146 NSP-8, and membrane protein (IgM) are largely characterized by a single, dominant epitope.  
147 While the receptor binding domain (RBD) of spike is highly important in host infection by the  
148 virus, we observe no conserved epitope signal against this region of spike (amino acids 331-  
149 524). Instead, we observe private spike epitopes in a subset of patients in our cohorts (Figure  
150 2C, Figure S1). We highlight patients with epitopes observe in multiple longitudinal draws, to  
151 decrease the likelihood of false positive signal.

152

153 *Unbiased, proteome-independent epitope analysis*

154           The IMUNE algorithm identified mapping and non-mapping epitope motifs that were  
155 highly enriched in COVID-19 repertoires (Methods)<sup>27</sup>. Linear epitopes identified by IMUNE  
156 largely overlapped with those identified by PIWAS (Figure 2). The IgG linear motifs mapped to  
157 epitopes on spike glycoprotein (n=10), nucleoprotein (n=8) and NSP8 (n=2). IgM linear motifs  
158 mapped to a single epitope at the furin cleavage site on spike glycoprotein that was also a  
159 target for IgG antibodies, as well as one epitope on the SARS-CoV-2 membrane protein. A  
160 significant number of motifs identified by IMUNE did not directly map to linear regions of the  
161 SARS-CoV-2 proteome. We have observed from studies with monoclonal antibodies that non-  
162 mapping motifs tend to represent mimotopes of both linear and structural epitopes.

163           Motifs were selected for inclusion in the SARS-CoV-2 epitope map if they demonstrated  
164 a specificity of at least 98% in 497 pre-pandemic controls (Methods). The resulting SARS-CoV-2  
165 panel of 45 IgG and 14 IgM motifs was compiled into a semi-quantitative epitope map, enabling  
166 visualization of motif enrichment for all evaluated COVID-19 and control samples (Figure 3A).  
167 We observed that an unlabeled, hierarchical clustering of samples based on these motif  
168 enrichments largely separates pre-pandemic control samples from COVID-19 patients.  
169 Focusing on those motifs with linear hits to SARS-CoV-2, we further observed sub-clusters of  
170 patients with reactivity to specific isotypes and antigens, from left-to-right: spike IgG+IgM, spike  
171 and membrane IgM, spike IgM, nucleocapsid IgG, and broadly reactive.

172

173 *SARS-CoV-2 diagnostic panels can classify NAT+ samples with sensitivity comparable to*  
174 *ELISA*

175           To develop a SARS-CoV-2 diagnostic panel, we selected a subset of peptide motifs that,  
176 in the training cohort, either exhibited high sensitivity and specificity or improved the breadth of  
177 coverage (Supplemental Table 2). We normalized and summed motif enrichments to generate  
178 a composite score and compared sub-panels to identify the panel with the maximal diagnostic

179 performance on the training cohort (Methods). A composite score of  $\geq 25$  was set as a cutoff for  
180 both IgG and IgM panels to obtain a specificity of  $\geq 99\%$  on the pre-pandemic training controls  
181 (Table 1). The panel performance was evaluated on a test cohort of 427 COVID-19 samples  
182 that were confirmed positive by NAT testing (Table 1, testing cohorts I-III). The classifier with the  
183 best overall performance is shown in Figure 3B. The sensitivity varied between 54% and 82%  
184 across the NAT+ cases from different cohorts, primarily based on the timing of blood collection  
185 relative to symptom onset for each cohort. A specificity of 99.3% for IgG and 99.1% for IgM was  
186 achieved on a test set of 1500 pre-pandemic repertoires that were tested for acute illness.  
187 Combining the IgG and IgM panels into a single test resulted in a panel specificity of 98.7%.  
188 Notably, no pre-pandemic samples were co-positive for IgG and M, thus the specificity for  
189 subjects that were positive for both IgG and IgM was 100% in the test control set. Forty-two  
190 percent of all tested COVID-19 samples met these criteria.

191 We plotted the SERA scores for samples from cohorts I and II, where timing of the blood  
192 draw relative to date of symptom onset was provided (Figure 3B). The panel exhibited a  
193 sensitivity of 47% at 0-5 days after symptom onset, 64% at 5-10 days and  $\geq 90\%$  at >10 days  
194 post symptom onset. Where predicate SARS-CoV-2 ELISA results were available, we  
195 compared performance relative to SERA in SARS-CoV-2 NAT+ samples. Overall, SERA IgG  
196 and IgM panels together demonstrated similar sensitivity to three different ELISAs in current use  
197 (95% CI, Wilson score) (Table 2).

198

### 199 *Structural epitope mapping*

200 To further interrogate functional relevance of the identified motifs, we mapped motifs to  
201 the surface of published SARS-CoV-2 spike glycoprotein crystal structures. We observed that  
202 the linear motif LPFQQ, which has been previously implicated as a neutralizing epitope<sup>25</sup>,  
203 mapped to a single location on the surface of spike glycoprotein (Figure 3C). Using these same  
204 methods, we examined possible structural maps of motifs without linear maps to SARS-CoV-2.



205 We highlight one exemplary motif, YWXYFXK which was found to map to the RBD of spike  
206 glycoprotein (Figure S2). Based on our previous observations that tryptophan tends to confer  
207 structural characteristics on our peptide epitopes, we additionally examined the mapping of the  
208 slightly modified motif YXXYFXK which we found also maps strongly to spike (Figure 3C). In  
209 addition to the highlighted match to spike, YXXYFXK had two less feasible maps to spike  
210 glycoprotein (Figure S2).

211 We also investigated the potential neutralization capacity of these motifs. We plotted the  
212 neutralization titer of each sample against the enrichment of the motif in those samples (Figure  
213 3D). For both motifs, we observed that higher enrichment values tended to be present in  
214 patients with higher titer neutralization activity.

215

#### 216 *Motifs and epitopes associated with disease severity*

217 Based on prior studies that described subjects with severe disease possessing a  
218 stronger and, perhaps, earlier humoral IgG response in both spike and nucleoprotein relative to  
219 subjects with mild disease<sup>29,30</sup>, we examined differences in epitope severity detected by SERA.  
220 We compared the SERA IgG panel score (developed to distinguish COVID-19 patients from  
221 pre-pandemic controls) across the spectrum of severities present in our population (Figure 4A).  
222 We observed a significant elevation of the panel score in patients with severe or moderate  
223 disease compared to their mild disease counterparts. To understand the specific epitopes  
224 driving the severity delineation, we identified the 10 motifs with the most significant t-test p-value  
225 when comparing severe and mild disease (Figure 4B). We observe a potential confounding of  
226 days since onset of symptoms with the SERA IgG score (Figure S3). All 10 motifs were  
227 identified in the IgG screen and 9 out of 10 motifs did not possess a linear map to SARS-CoV-2.  
228 In the hierarchical clustering of samples, we observe subsets of severe patients with preferential  
229 enrichment for differing motifs. After splitting our data into 2/3 training and 1/3 testing cohorts,

230 we built a simple LASSO model to classify moderate/severe from mild disease, and observed  
231 encouraging performance (training AUC 0.92, testing AUC 0.9, Figure S3).

232 One of the distinguishing features of the SARS-CoV-2 coronavirus is the acquisition of  
233 polybasic residues (RRAR) at the cleavage site of the S1/S2 boundary. Cleavage of spike  
234 protein at this site is required to enable viral membrane fusion<sup>31,32</sup>. It has been proposed that  
235 this novel sequence enables the virus to take advantage of host proteases, such as furin, that  
236 cleave proteins with this recognition sequence, thereby increasing the potential tropism of the  
237 virus relative to other coronaviruses<sup>31,33</sup>. We asked if this site elicited an immune response, and  
238 if so, was it seen differentially in subjects with different disease severity. In the spike epitope  
239 map, signal at this sequence location is both prominent and prevalent in the cohorts — 120 out  
240 of 385, or 31% of subjects, had epitope signals >99% of that seen in controls. We also  
241 determined that the site elicited a statistically significantly stronger immune response in subjects  
242 with severe disease relative to subjects with mild or moderate disease (Figure 4C). Specifically,  
243 39%, 23%, and 20% of severe, moderate, and mild cases, respectively, had strong epitope  
244 signals greater than 99% of that in the controls.

245 The novel eight amino acid furin cleavage site (RRAR|SVAS) in spike maps identically to  
246 a peptide sequence in one protein in the human proteome, the amiloride sensitive sodium  
247 channel ENaC- $\alpha$  protein<sup>33</sup>. This protein is expressed on the surface of multiple tissues  
248 implicated in COVID-19 pathology, and similar to spike, requires cleavage for activation. As the  
249 sites share the eight amino acid furin cleavage sequence, not surprisingly, we see a highly  
250 correlated PIWAS immune signal in both proteins (Figure S3) that is also statistically stronger in  
251 severe disease relative to mild or moderate disease (Figure 4D). We also note that in severe  
252 cases, a number of very strong epitopes in ENaC- $\alpha$  outside of the cleavage site are seen  
253 relative to mild cases. The signal at both sites was also seen to increase over time, particularly  
254 between 2 and 4 weeks, indicating a likely adaptive immune response to this site (Figure S3).

255 In addition to spike and nucleoprotein, a robust immune response has been described  
256 against the ORF8 protein<sup>34</sup>. Several reports have described a variant of SARS-CoV-2 with a  
257 382-nucleotide deletion in ORF7b and ORF8 as well as an association of the deletion with a  
258 milder disease course<sup>35</sup>. While we do not have genotype information for all strains, based on the  
259 GISAID database we assume that most of the samples in our cohorts do not have this deletion.  
260 To explore the possible association of immune response with disease severity, we analyzed the  
261 PIWAS signal against ORF8, which encompasses most of the 382-nucleotide deletion. While  
262 there appear to be more extremely high signals in severe cases, using an outlier sum statistic,  
263 the PIWAS signal in ORF8 does not reach statistical significance in severe cases relative to mild  
264 and moderate cases (Figure 4E, F).

265

#### 266 *PIWAS prediction of antibody cross-reactivity to other coronaviruses*

267 We next investigated SARS-CoV-2 epitopes that may cross-react with other  
268 coronaviruses as previous exposure to coronaviruses could have protective or even deleterious  
269 effects on symptoms<sup>6,7</sup>. To identify potential cross-reactive epitopes, we performed PIWAS  
270 using the epitope repertoires from COVID-19 samples against various coronavirus proteomes,  
271 including SARS-CoV-2, SARS-CoV (SARS), MERS, and the four common human  
272 coronaviruses (hCoVs) HKU1, OC43, 229E, and NL63. Analysis of average PIWAS values for  
273 spike glycoprotein across coronaviruses revealed epitopes that were conserved in many  
274 coronaviruses as well as epitopes that were specific to SARS-CoV-2 (Figure 5A). We identified  
275 10 epitopes enriched against the SARS-CoV-2 proteome (average PIWAS >0.5), two and one  
276 of which overlapped with OC43 and NL63 epitopes, respectively. For example, the region  
277 corresponding to spike 809-834 in SARS-CoV-2 (alignment indices 1140-1170) contained an  
278 epitope that was observed against all coronaviruses analyzed (Figure 5B). However, at spike  
279 1141-1162 in SARS-CoV-2 (alignment indices 1500-1525) an epitope was observed only  
280 against SARS-CoV-2, SARS, MERS, and OC43 proteomes, with OC43 exhibiting the highest

281 average PIWAS value. After evaluating enrichment for these cross-reactive spike epitopes in  
282 COVID-19 cases with different disease severity, we found there was no statistical difference  
283 between severe, moderate, and mild cases (Figure 5C).

284 In contrast to spike, nucleoprotein exclusively contained epitopes specific to SARS-CoV-  
285 2 and SARS, with 4 epitopes against the SARS-CoV-2 proteome (Figure 5D). Strong epitopes  
286 were observed against SARS-CoV-2 at regions 150-178 (alignment indices 165-195) and 392-  
287 419 (alignment indices 480-510) with no signal observed against hCoVs (Figure 5E). We  
288 determined that these nucleoprotein epitopes were significantly enriched in severe and/or  
289 moderate cases compared to mild cases (Figure 5F).

290

#### 291 *Epitope signal in mutated SARS-CoV-2 strains*

292 To study the possible effects of known mutations to the SARS-CoV-2 virus on antibody  
293 response, we leveraged the ability of PIWAS to interrogate the SERA database with any  
294 sequence of interest. In the 96,437 sequenced strains from GISAID, we enumerated 21,127  
295 distinct amino acid mutations to spike glycoprotein, nucleoprotein, envelope protein, and  
296 membrane protein<sup>36,37</sup>. For each mutation, we compared epitope signal against the wild-type  
297 (WT) and mutant position in every COVID-19 specimen. We observed a bias towards mutations  
298 yielding a decreased PIWAS signal relative to WT (Figure 6A). A subset of these mutations  
299 yielded decreased signal across a large number of COVID-19 patients (Figure 6B). To assess  
300 the significance of this decreased epitope signal, we *in silico* randomly mutated amino acids  
301 throughout the same protein sequences as a null distribution. The Kolmogorov-Smirnov test  
302 comparing the observed and null distributions was highly significant ( $p=3e-11$ ), indicating that  
303 the bias towards mutants that generate a decreased epitope signal exceeds that which would  
304 be explained purely due to chance (Figure S4). For membrane protein, nucleoprotein, and spike  
305 glycoprotein, we highlight exemplar mutations which resulted in decreased epitope signal  
306 across a large number of patients (Figure 6C) and, in the case of spike glycoprotein, are on the

307 surface of the protein according to the crystal structures considered in this paper<sup>31,32</sup>. In  
308 contrast, the dominant spike glycoprotein D614G exhibits no epitope signal for either the wild-  
309 type or mutant strains (Figure 6D).

310

## 311 **Discussion**

312 While conventional serology is a cornerstone of infectious disease diagnosis, the  
313 COVID-19 pandemic has raised many questions not answered by these testing modalities  
314 alone. Here we have shown that high-content random bacterial peptide display library screening  
315 using SERA provides a tool to broadly and deeply probe individual antibody repertoires. These  
316 profiles, both individually and in the aggregate, can yield insights into disease severity,  
317 immunity, cross-reactivity to other coronaviruses (including SARS-CoV-2 mutant strains), and  
318 autoimmune sequelae.

319 By taking a focused, proteome-constrained approach to identifying signal against the  
320 SARS-CoV-2 proteome, we both reiterate the established immunological relevance of spike and  
321 nucleoprotein as well as identify less described signals against protein 3a and NSP-8. Epitope-  
322 level characterization of these antigens highlights particularly immunogenic epitopes within each  
323 protein, which might serve as targets in the development of vaccines and therapeutics. In  
324 particular, we identified strong epitopes in nucleoprotein including at amino acids 158-172 and  
325 the C-terminal domain 380-419, as well as epitopes in spike glycoprotein including at amino  
326 acids 555-572, 810-828, and 1145-1159, consistent with previous studies<sup>4,24,38</sup>. Additionally, we  
327 highlight novel and less-studied epitopes, including a dominant IgM epitope from membrane  
328 protein (amino acids 1-12) which could provide utility in early diagnostics. While we did not  
329 observe spike RBD epitopes that were conserved across the patient cohort, we found  
330 compelling examples of private RBD epitopes. The lack of linear epitopes towards spike RBD is  
331 unsurprising given the complex structural nature of spike, with many strands running in parallel

332 likely yielding an abundance of structural mimotopes (also reflected in the quantity of non-  
333 mapping motifs in our diagnostic panel).

334         Leveraging our database of thousands of pre-pandemic repertoires collected from  
335 healthy individuals as well as people with infections, autoimmune diseases, and cancer across  
336 all age groups and geographies, we were able to assess the specificity of the SARS-CoV-2  
337 antibody response and identify a panel of epitopes that could distinguish COVID-19 cases from  
338 controls with accuracy similar to conventional serological testing.

339         We further investigated the possible origins of the non-mapping motifs by attempting to  
340 map them structurally to spike glycoprotein. We validated the mapping by showing that it  
341 accurately identifies the linear motif LPFQQ, and then applied the method to non-mapping  
342 motifs. We find that the motif YWXYFXK exclusively maps to the RBD. However, previous  
343 observations have suggested that tryptophan (W) may be more important for conferring  
344 structure to the mimotope than for identity mapping, yet still the more general motif YXXYFXK  
345 maps to RBD as well. When combined with the neutralization titers of samples in which this  
346 motif is enriched, it is possible to speculate about the mechanism of neutralization. If the  
347 antibodies that recognize this motif bind to the RBD of spike glycoprotein, they may block the  
348 ability of SARS-CoV-2 to bind to ACE2 and inhibit viral entry and infection.

349         One of the ongoing areas of development in this approach is that while we have  
350 assumed that the identity of the residues remains constant between motif and the epitope, it is  
351 possible that amino acid substitutions could be allowed. We have attempted a first pass to  
352 mitigate this by allowing for a more general mapping with the modification of the W to an X, but  
353 we continue to iterate on this model to more accurately account for residue mismatches in  
354 mapping motifs to the structure. While these methods are still under development, the results  
355 here demonstrate the applications of such a method.

356         Consistent with previous studies, we find that the humoral immune response against  
357 SARS-CoV-2 is stronger in severe and moderate disease relative to mild disease<sup>4,39,40</sup>. This

358 finding is consistent with a general pattern of disease associated with immunopathology in  
359 COVID-19. We also identified specific epitope profiles that correlate with disease severity and  
360 combined these epitopes into a preliminary disease severity classification model. To further  
361 validate these findings we would require a separate, validation cohort of patients which span  
362 mild and severe disease states. Importantly, many of our disease severity analyses are  
363 potentially confounded by the number of days since onset of symptoms in the COVID-19  
364 subpopulations, partially due to the challenge of both identifying disease onset in mild patients  
365 and collecting samples from non-hospitalized patients.

366 Using *in silico* analysis of repertoires on the human proteome, we are also able to  
367 identify candidate cross-reactive or novel autoantigen epitopes that may be important in disease  
368 pathogenesis. The polybasic cleavage site seen in SARS-CoV-2 is unique among  
369 coronaviruses and potentially enables it to increase its tissue tropism<sup>33</sup>. We demonstrate that  
370 the immune response at this site is predicted to be both significantly prominent and prevalent  
371 relative to a pre-pandemic cohort, as well as significantly stronger in severe and moderate  
372 versus mild disease. The sequence is shared with the amiloride sensitive sodium channel  
373 ENaC- $\alpha$ , which is responsible for sodium influx into tissue<sup>41</sup>. Disruption of this channel in  
374 individuals with variants has been associated with pulmonary edema and alveolar fluid  
375 overload<sup>40,42</sup>. Thus, this channel has been investigated in SARS-CoV-2 and other respiratory  
376 illnesses for possible pathogenic implication in disease and as a target for therapy<sup>43</sup>.

377 Our finding that immune signal at this site is significantly elevated suggests the  
378 possibility of molecular mimicry with potential pathogenic consequences. While we do not have  
379 direct evidence of binding of antibody to ENaC- $\alpha$  at this site, functional blockage of the site  
380 could be postulated to prevent the cleavage of the ENaC- $\alpha$  channel, which is necessary for  
381 channel activation<sup>43</sup>. The signal against this site increases over time in the majority of cases  
382 indicating an adaptive immune response, but the effect of this response on pathogenicity is  
383 unclear as binding at the spike site could in fact reduce infectivity of the virus. A recent study

384 has also noted that binding at this site reduces the RBD-ACE2 binding energy, and therefore  
385 could be a potential site for neutralizing antibodies<sup>44</sup>. Functional analyses and experiments are  
386 thus required to investigate whether cross-reactivity occurs and to distinguish the effect of  
387 antibodies binding to either the viral or host antigens at this site. The ability to query potential  
388 autoantigen signal using SERA in the context of SARS-CoV-2 infection and epitopes is an area  
389 for continued inquiry given the mounting data supporting the significance of autoantigens in the  
390 immunopathology of COVID-19<sup>10,45</sup>.

391 Milder disease has been described in subjects with the 382-ORF8 deletion variant, and  
392 the ORF8 protein has been noted to be associated with strong humoral response<sup>35,46</sup>. In our  
393 study, we also see significant response relative to a pre-pandemic cohort in ORF8. While a few  
394 epitopes appear quite strong in some individuals in ORF8 with severe disease, the overall signal  
395 across the antigen was not seen to be statistically significant in mild versus severe disease.  
396 Specific, strong epitope signals in ORF8 could be postulated to contribute to severe disease  
397 through a variety of mechanisms, but this would also need to be explored through further  
398 epidemiological and experimental analysis.

399 By evaluating epitope signal in COVID-19 cases against common human coronavirus  
400 (hCoV) proteomes, we predicted prevalent cross-reactive epitopes particularly in the S2 domain  
401 of spike. Given the strength and prevalence of these cross-reactive epitopes, it is plausible that  
402 previous exposure to hCoVs contributed to these antibody responses, a boosting phenomenon  
403 recently described in COVID-19 cases<sup>47</sup>. In particular, the cross-reactive epitope at spike amino  
404 acids 809-834 near the fusion domain has been shown to elicit an antibody response in SARS-  
405 CoV-2 uninfected adolescents and adults<sup>48</sup>. Interestingly, antibodies targeting this epitope  
406 demonstrated neutralizing capacity using antibody depletion assays<sup>38</sup>. More broadly, the  
407 presence of spike-reactive T cells in healthy donors has been observed against SARS-CoV-2 as  
408 well as hCoVs 229E and OC43, primarily reactive towards the spike S2 domain<sup>6</sup>. While these  
409 findings suggest a role for cross-reactive epitopes in the response to SARS-CoV-2 infection, it is



410 uncertain what impact pre-existing antibodies have towards protection, immunity, and disease  
411 progression. Recent studies suggest that pre-existing antibodies from hCoVs exist but are not  
412 associated with protection<sup>47,49</sup>. We observed that prevalent cross-reactive epitopes in spike  
413 were not associated with COVID-19 severity while multiple nucleoprotein epitopes specific to  
414 SARS-CoV-2 and SARS were significantly enriched in severe cases compared to mild. Notably,  
415 it has been shown that convalescent COVID-19 patients exhibited a shift in antibody response  
416 towards spike compared to a nucleoprotein-directed antibody response in deceased patients<sup>3</sup>.  
417 Given that cross-reactive epitopes were observed in spike, additional investigation will be critical  
418 towards understanding pre-existing antibody responses that may impact SARS-CoV-2 infection  
419 and COVID-19 progression.

420         The decreased epitope signal in COVID-19 patients against mutant strains of SARS-  
421 CoV-2 compared to WT is suggestive of evolutionary evasion of the antibody response<sup>50-52</sup>.  
422 Under this hypothesis, SARS-CoV-2 strains are undergoing selective pressure to evade  
423 antibody response, resulting in strains that may be less susceptible to clearance by those  
424 previously infected with wild-type SARS-CoV-2<sup>53,54</sup>. While these observations do not inherently  
425 indicate greater infectivity, the public health consequences of epitope mutation are concerning  
426 and further suggestive of the potential for the SARS-CoV-2 virus to periodically re-emerge and  
427 reinfect individuals with prior exposure. While not conclusive, these observations reveal the  
428 importance of monitoring epitope mutations and could be used to guide therapeutic and vaccine  
429 development efforts to focus on epitopes that are less susceptible to evasion, which would be  
430 more broadly cross-reactive and robust to evolutionary changes.

431         The dominant strain of SARS-CoV-2 which is now in circulation possesses the D614G  
432 mutation. Based on our data, neither the wild-type nor the mutant confer a significant linear  
433 epitope, consistent with observations that the mutation is most notable for its effect on the  
434 structure of spike<sup>55</sup>.

435           We acknowledge various limitations with the SERA platform that impact this study. Much  
436 of this study has focused on dominant epitopes prevalent in COVID-19 cases, but many of the  
437 private epitopes not explicitly discussed here, particularly in spike RBD, are critical to fully  
438 understanding the protective antibody response and clinical outcomes. Moreover, there are  
439 clear limitations for probing the epitope repertoire with linear peptides, chiefly the challenges of  
440 identifying structural epitopes and the role of post-translational modifications such as glycans<sup>56</sup>.  
441 While a random peptide library enables unique opportunities to identify structural mimics, much  
442 work remains in cataloguing and mapping these mimics to their cognate antigens.

443           In summary, we present the application of SERA to assess SARS-CoV-2 seropositivity  
444 and to characterize a high-resolution map of motifs and epitopes in individuals and populations.  
445 We demonstrate the ability of the platform to assess disease severity, to identify structural  
446 motifs associated with neutralization, to compare *in silico* epitope response to multiple  
447 coronavirus strains, to assess potential immune escape at sites of variation, to evaluate  
448 longitudinal changes in signal, and to reveal potential autoantigen response, all with one assay.  
449 The random nature of the libraries, the ability to identify linear mimics of structural epitopes, and  
450 the ability to leverage quality-controlled reference data from a large pre-pandemic cohort all  
451 contribute to SERA's ability to elucidate the humoral immune response in SARS-CoV-2  
452 infection.

453           Our findings support those of other studies that find clear differences in the humoral  
454 response of individuals with different clinical severity and trajectories. While we may identify  
455 associations between high resolution epitope and motif signals and disease severity, much work  
456 is required to establish functional or causal relationships. Examining and correlating epitopes to  
457 clinical efficacy in the context of vaccines and therapeutic antibodies will help to elucidate the  
458 connection between measured immune response and patient outcome.

459           Yet the epitope landscape can change, as it is already clear that coronaviruses mutate  
460 and SARS-CoV-2 is no exception. Potential changes in the infectivity of the virus in just this first

461 year of the current health crisis underscore the need to track evolving immune responses and  
462 clinical features in populations world-wide<sup>55,57-60</sup>. We have demonstrated the ability to capture  
463 and query both past and present repertoires through analysis of both pre-pandemic and current  
464 pandemic samples. Using SERA to observe longitudinal immune responses against the human  
465 proteome and coronavirus in the context of persistent symptoms or reinfection enables  
466 construction of a detailed picture of infection, immunity and disease in COVID-19. SERA's ability  
467 to query against any variant or future emerging genomes can be used to support ongoing  
468 management of the current health crisis and future novel outbreaks.

469

## 470 **Materials and Methods**

### 471 *Biospecimens and Cohorts*

472 Sera or plasma from confirmed or suspected COVID-19 cases were acquired from Yale,  
473 Santa Barbara Cottage Hospital (SBCH), LabCorp, BioIVT and Blood Centers of America  
474 (BCA). Samples were de-identified prior to receipt at Serimmune. All samples and associated  
475 metadata are shown in Supplemental Table 1.

476

### 477 *Yale cohort*

478 Samples were acquired as part of the Yale IMPACT biorepository study. The cohort  
479 included inpatients that tested positive by PCR for SARS-CoV-2, outpatients with suspected  
480 disease based on symptoms and Health Care Workers (HCW) that became positive by serial  
481 PCR or serology testing every 2 weeks. COVID-19 cases were classified as mild if patients  
482 were not hospitalized, moderate if hospitalized, and severe if on high-flow nasal canula, BiPAP  
483 or other non-invasive ventilation, intubated or died from COVID-19. Participation in the study  
484 was voluntary and the study protocol was approved by the Yale Institutional Review Board.

485

486 *SBCH cohort*

487 Biobanked sera or plasma from individuals that previously tested positive for COVID-19  
488 were provided by the SBCH Biobank. Clinical data, including age, sex, and disease severity  
489 were obtained by SBCH staff for inclusion in the biobank. Specimens were collected from both  
490 inpatient and ambulatory settings and were coded as asymptomatic, mild/moderate if the  
491 subject had symptoms consistent with COVID-19, or severe if the individual required admission  
492 to the ICU for symptoms. Participation in these studies was voluntary and the study protocol  
493 was approved by the SBCH Institutional Review Board.

494

495 *LabCorp cohort*

496 The majority of samples were remnant sera from acutely ill, ICU hospitalized, PCR  
497 confirmed COVID-19 cases with high IL-6 test results (n=235). These cases were classified as  
498 severe disease. An additional ten suspected COVID-19 cases were from individuals with mild  
499 symptoms. A subset of these had serological evidence of infection by anti-RBD ELISA and/or  
500 neutralization assay data.

501

502 *BioIVT cohort*

503 Remnant serum samples with serological evidence of infection by a positive Epitope EDI  
504 IgG test (n=20) or a positive NAT test (n=1) were purchased from BioIVT. A subset had disease  
505 severity characterization provided by the vendor.

506

507 *BCA cohort*

508 Plasma samples were collected from healthy blood donors in New York during the  
509 period of March–July of 2020 as part of a collaboration with The Blood Centers of America. Two  
510 samples included in the study were collected from COVID-19 plasma donors with confirmed  
511 disease. Suspected COVID-19 cases included in the study had serological evidence of infection

512 based on a positive SERA IgG or IgM result that was subsequently confirmed by S1 spike and  
513 nucleocapsid ELISA IgG in the majority of cases. Cases from healthy donors were classified as  
514 mild disease.

515

#### 516 *SERA serum screening*

517 A detailed description of the SERA assay has been published<sup>26</sup>. For this study, serum or  
518 plasma was incubated with a fully random 12-mer bacterial display peptide library ( $1 \times 10^{10}$   
519 diversity, 10-fold oversampled) at a 1:25 dilution in a 96-well, deep well plate format. Antibody-  
520 bound bacterial clones were selected with 50  $\mu$ L Protein A/G Sera-Mag SpeedBeads (GE Life  
521 Sciences, cat#17152104010350) (IgG) or by incubation with a biotinylated anti-human IgM  
522 antibody (Jackson ImmunoResearch, cat# 709-066-073) final assay dilution 1:100, followed by  
523 a second incubation with 50  $\mu$ L Dynabead MyOne Streptavidin T1 conjugated magnetic beads  
524 (IgM) (Thermo-Fisher 65602). The selected bacterial pools were resuspended in growth media  
525 and incubated at 37°C shaking overnight at 300 RPM to propagate the bacteria. Plasmid  
526 purification, PCR amplification of peptide encoding DNA, barcoding with well-specific indices  
527 was performed as described<sup>26</sup>. Samples were normalized to a final concentration of 4nM for  
528 each pool and run on the Illumina NextSeq500.

529

#### 530 *Spike S1 and nucleoprotein ELISA*

531 The SARS-CoV-2 Spike S1 and N antigen ELISA data were provided by Yale and  
532 LabCorp. Spike S1 and nucleoprotein ELISAs on the SBCH COVID-19 samples were performed  
533 in house using recombinant proteins (ACRO Biosystems, S1N-C52H3 and NUN-C5227,  
534 respectively). A cut-off value for positivity was established using 3 times the standard deviation  
535 of 502 pre-pandemic controls for the IgG and 82 pre-pandemic controls for IgM assays. Briefly,  
536 plates (Nunc MaxiSorp) were coated with recombinant proteins, 0.5  $\mu$ g/ml for IgG and 1  $\mu$ g/ml  
537 for IgM at 4°C overnight. After washing, plates were blocked with PBS containing 5% non-fat

538 milk for 2 hours at room temperature. Plates were then incubated with serum diluted 1/250 in  
539 blocking buffer for 1 hour at room temperature. Plates were washed, then incubated with HRP-  
540 goat anti-human IgG or HRP-donkey anti-human IgM (Jackson ImmunoResearch) secondary  
541 antibody diluted 1/10,000 in blocking buffer for 1 hour at room temperature. After washing, the  
542 reaction was developed with 3,3',5,5'-teramethylbenzidine substrate solution (ThermoFisher) for  
543 15 minutes and stopped with 1M HCL. The absorbance was measured on a Tecan Spectrafluor  
544 plus plate reader at 450 nm.

545

#### 546 *Cell lines and virus*

547 VeroE6 kidney epithelial cells) were cultured in Dulbecco's Modified Eagle Medium  
548 (DMEM) supplemented with 1% sodium pyruvate (NEAA) and 5% fetal bovine serum (FBS) at  
549 37°C and 5% CO<sub>2</sub>. The cell line was obtained from the ATCC and has been tested negative for  
550 contamination with mycoplasma. SARS-CoV-2, strain USA-WA1/2020, was obtained from BEI  
551 Resources (#NR-52281) and was amplified in VeroE6 cells. Cells were infected at a MOI 0.01  
552 for four three days to generate a working stock and after incubation the supernatant was  
553 clarified by centrifugation (450g × 5min) and filtered through a 0.45-micron filter. The pelleted  
554 virus was then resuspended in PBS then aliquoted for storage at – 80°C. Viral titers were  
555 measured by standard plaque assay using Vero E6 cells. Briefly, 300ul of serial fold virus  
556 dilutions were used to infect Vero E6 cells in MEM supplemented NaHCO<sub>3</sub>, 4% FBS 0.6%  
557 Avicel RC-581. Plaques were resolved at 48hrs post infection by fixing in 10% formaldehyde for  
558 1 hour followed by with 0.5% crystal violet in 20% ethanol staining. Plates were rinsed in water  
559 to plaques enumeration. All experiments were performed in a biosafety level 3 with the Yale  
560 Environmental Health and Safety office approval.

561

#### 562 *Neutralization assay*

563 Patient and healthy donor sera were isolated as before and then heat treated for 30m  
564 at 56 °C. Sixfold serially diluted plasma, from 1:3 to 1:2430 were incubated with SARS-CoV-2  
565 for 1 h at 37 °C. The mixture was subsequently incubated with VeroE6 cells in a 6-well plate for  
566 1hour, for adsorption. Then, cells were overlaid with MEM supplemented NaHCO<sub>3</sub>, 4% FBS  
567 0.6% Avicel mixture. Plaques were resolved at 40hrs post infection by fixing in 10%  
568 formaldehyde for 1 hour followed by staining in 0.5% crystal violet. All experiments were  
569 performed in parallel with negative controls sera, at an established viral concentration to  
570 generate 60-120 plaques/well.

571

#### 572 *PIWAS analysis*

573 We applied the previously published PIWAS method<sup>28</sup> to identify antigen and epitope  
574 signals against the Uniprot reference SARS-CoV-2 proteome (UP000464024)<sup>61</sup>. The PIWAS  
575 analysis was run on the IgG SERA data with a single sample per COVID-19 patient (for a total  
576 of 579 patients) versus 497 discovery pre-pandemic controls, and the 1500 validation controls  
577 used as the normalization cohort. Additional parameters include: a smoothing window size of 5  
578 5mers and 5 6mers; z-score normalization of kmer enrichments; maximum peak value; and  
579 generation of epitope level tiling data. Antigens were ranked using the Mann-Whitney U false  
580 discovery rate, following the hypotheses of conserved epitopes in the context of infectious  
581 disease. For top antigens, tiling data was generated for every case and control sample. 95<sup>th</sup>  
582 quantile bands were calculated based on each population separately. The most significant RBD  
583 epitopes were identified in COVID-19 patients with draws from at least 2 timepoints and a  
584 PIWAS value of at least 6 occurring between the 319<sup>th</sup> and 541<sup>st</sup> amino acids.

585

#### 586 *IMUNE-based motif discovery*

587 Peptide motifs representing epitopes or mimotopes of SARS CoV-2 specific antibodies  
588 were discovered using the IMUNE algorithm<sup>27</sup>. A total of 164 antibody repertoires from 98

589 hospitalized subjects from the Yale IMPACT study were used for motif discovery. The majority  
590 of subjects were confirmed SARS CoV-2 positive by nucleic acid testing (NAT). IMUNE  
591 compared ~30 disease repertoires with ~30 pre-pandemic controls and identified peptide  
592 patterns that were statistically enriched ( $p$  value  $\leq 0.01$ ) in  $\geq 25\%$  of disease and absent from  
593 100% of controls. Multiple assessments were run with different subsets of cases and controls  
594 both for IgG and IgM. Peptide patterns identified by IMUNE were clustered using a PAM30  
595 matrix and combined into motifs. The output of IMUNE included hundreds of candidate IgG and  
596 IgM motifs. A motif was classified as positive in a given sample if the enrichment was  $\geq 4$  times  
597 the standard deviation above the mean of the training control set. The candidate motifs were  
598 further refined based on at least 98% specificity. The final set of motifs was validated for  
599 sensitivity and specificity on an additional 1500 pre-pandemic controls and 406 unique  
600 confirmed COVID-19 cases from four separate cohorts (test cohorts I-IV, Table 1).

601

#### 602 *Development of a diagnostic classifier for COVID-19*

603 To generate a diagnostic score that classified subjects as serologically positive for  
604 antibodies to COVID-19, motif enrichment values were normalized using the mean and standard  
605 deviation of enrichments within the training set of pre-pandemic control repertoires. Individual  
606 SARS-CoV-2 motif normalized “z-scores” were then summed to obtain a composite score for  
607 each sample. A composite score of 25 was established as a cutoff for positivity for each panel to  
608 obtain a specificity of  $>99\%$  on the pre-pandemic training controls.

609

#### 610 *Structural motif mapping*

611 Structural motif mapping was carried out by identifying a network of neighboring  
612 residues on the surface of a protein structure and looking in that network for matches to the  
613 motif of interest. Neighboring residues were residues which had  $\alpha$ -carbons within 8 Å. The  
614 surface of the protein structure was calculated using the MSMS program<sup>62</sup> with a probe radius



615 of 2.5 Å. These values are line with other algorithms for mapping mimotopes to structures<sup>63,64</sup>  
616 and were further optimized using our in-house dataset of monoclonal antibodies (data not  
617 shown).

618         Once each match to a motif was found in the surface network of neighbors, each residue  
619 is scored by the number of ways it was found to match to a motif. For example, the motif SE[RI]  
620 might map to SER on the surface, and additionally to SEI on the surface, where the same S and  
621 E are used. In this case, S would have a value of 2, E would have a value of 2, while R would  
622 get a value of 1, and I would get a value of 1. Each residue was then colored according to these  
623 values to produce the heat maps shown in the figures.

624         Structures used were downloaded from rcsb.org<sup>65,66</sup>. Due to the recent focus on SARS-  
625 CoV-2 there are many structures for spike glycoprotein in PDB. The following structures were  
626 chosen due to their high sequence coverage, and in order to represent a variety of  
627 conformations and binding states to ACE2: 6ZGG,6ZGI,7A93,7A95,7A97<sup>31,32</sup>. PDB structures  
628 were processed with Biopython<sup>67,68</sup> and visualized with PyMol<sup>69</sup>.

629

### 630 *Mild versus severe disease analysis*

631         For samples where clinical severity was known, we compared SERA IgG panel scores  
632 using the outlier sum statistic<sup>28,70</sup>. Using a t-test, we compared enrichments for all IgG and IgM  
633 motifs between the severe/moderate and mild populations. The 10 most significant motifs were  
634 highlighted and hierarchically clustered (Euclidean distance, Ward clustering<sup>71</sup>). Severity based  
635 on PIWAS signal against the furin cleavage and ORF8 regions was similarly compared using  
636 the outlier sum statistic. To identify potential auto-antigenic signal against ENAC- $\alpha$ , a PIWAS  
637 analysis was performed (using the same parameters as above) using the Uniprot<sup>61</sup> reference  
638 human proteome (UP000005640).

639

### 640 *Common coronavirus analysis*

641 We identified Uniprot reference proteomes for the four common human coronaviruses  
642 [OC43 (UP00007552), HKU1 (UP000122230), 229E (UP0006716), and NL63 (UP000145724)]  
643 and more severe strains [SARS (UP000000354) and MERS(UP000171868)]<sup>61</sup>. For each  
644 proteome, we ran a PIWAS with the same parameters as the SARS-CoV-2 PIWAS (above). For  
645 spike glycoprotein and nucleoprotein, we averaged PIWAS tiling values for the COVID-19  
646 cohort across each proteome. A multiple sequence alignment of all these coronavirus  
647 sequences was performed using Clustal Omega<sup>72</sup>. Using this alignment index, we identified  
648 regions of divergent and convergent signal across the coronavirus proteomes in the COVID-19  
649 population. For regions of interest, we calculated the significance of differences in patient  
650 severity using the Wilcoxon rank sum test.

651

#### 652 *GISAID originating laboratories*

653 Proteome sequences of 96,437 SARS-CoV-2 strains were downloaded from the GISAID  
654 database. We gratefully acknowledge the authors from the originating laboratories responsible  
655 for obtaining these specimens and the submitting laboratories where genetic sequence data  
656 were generated and shared via the GISAID initiative<sup>36,37</sup>. Supplemental Table 3 provides a  
657 complete list of these strains, authors, and laboratories used in this manuscript (Supplemental  
658 Table 3).

659

#### 660 *SARS-CoV-2 strain analysis*

661 For each of the 96,437 SARS-CoV-2 proteomes, we identified amino acid mutations  
662 relative to the original SARS-CoV-2 strain (hCoV-19/Wuhan/WIV04/2019). Incomplete  
663 proteomes were not considered. A total of 21,127 unique amino acid mutations were identified  
664 across spike glycoprotein, membrane protein, envelope protein, and nucleoprotein. For each  
665 mutation, a region of 10 flanking amino acids on either side was considered as the mutated  
666 region, for comparison against the same length wild-type region. For every sample, we

667 calculated and compared PIWAS scores for the wild-type and mutant sequences. To assess  
668 significance of the observed bias, we generated *in silico* random mutations to these same  
669 proteins and performed the same analysis. We compared the actual and random signals using a  
670 Kolmogorov-Smirnov test.

671

#### 672 *Data availability statement*

673 Motif enrichment and PIWAS data have been made available at:

674 <https://www.serimmune.com/covidData.zip>

675

#### 676 *Acknowledgements*

677 We would like to thank the entire team at Serimmune who has made this study feasible,  
678 including: Jack Coupart, Cameron Gable, Timothy Johnston, Steve Kujawa, Ulysses Leyva,  
679 Vikram Mahuvakar, Noah Nasser, Kenyon Plummer, Heidi Smith, Elizabeth Stewart.

680

#### 681 *Author contributions*

682 Conceptualization: WAH, KK, JB, AI, AIK, JCS; Data generation: WAH, KK, JB, EBJ, MC, ACM,  
683 CSDC, SFF, LF, JF, GJ, DK, JK, CL, LLL, MCM, LP, JR, RW, EAW, Yale IMPACT Team; Data  
684 curation: WAH, KK, JB, EBJ, ACM, LF, DK, JK, CL, LP, AAW; Formal analysis: WAH, KK, JB,  
685 AD, MJ, JK, BM, JR, MZ, JCS; Resources: WAH, KK, JB, EBJ, MC, ACM, PSD, CSDC, AD,  
686 SFF, LF, JF, MJ, GJ, DK, JK, CL, LLL, BM, MCM, LP, JR, JRS, RW, EAW, MZ, AI, AIK, JCS;  
687 Visualization: WAH, KK, JB, MJ, BM, MZ, JCS; Writing- original draft: WAH, KK, JB, MJ, BM,  
688 MZ, JCS; Writing- reviewing & editing: WAH, KK, JB, EBJ, MC, ACM, PSD, CSDC, AD, SFF,  
689 LF, JF, MJ, GJ, DK, JK, CL, LLL, BM, MCM, LP, JR, JRS, RW, EAW, MZ, AI, AIK, JCS

690

#### 691 *Competing interests*

692 The authors declare the following competing interests: ownership of stocks or shares at  
693 Serimmune, paid employment at Serimmune, board membership at Serimmune, and patent  
694 applications on behalf of Serimmune.

695

## 696 **References**

- 697 1. Nishiura, H. *et al.* Estimation of the asymptomatic ratio of novel coronavirus infections  
698 (COVID-19). *International Journal of Infectious Diseases* **94**, 154–155 (2020).
- 699 2. Mizumoto, K., Kagaya, K., Zarebski, A. & Chowell, G. Estimating the asymptomatic  
700 proportion of coronavirus disease 2019 (COVID-19) cases on board the Diamond  
701 Princess cruise ship, Yokohama, Japan, 2020. *Eurosurveillance* **25**, (2020).
- 702 3. Atyeo, C. *et al.* Distinct Early Serological Signatures Track with SARS-CoV-2 Survival.  
703 *Immunity* **53**, 524-532.e4 (2020).
- 704 4. Amrun, S. N. *et al.* Linear B-cell epitopes in the spike and nucleocapsid proteins as  
705 markers of SARS-CoV-2 exposure and disease severity. *EBioMedicine* **58**, (2020).
- 706 5. Mathew, D. *et al.* Deep immune profiling of COVID-19 patients reveals distinct  
707 immunotypes with therapeutic implications. *Science* **369**, (2020).
- 708 6. Braun, J. *et al.* SARS-CoV-2-reactive T cells in healthy donors and patients with COVID-  
709 19. *Nature* (2020). doi:10.1038/s41586-020-2598-9
- 710 7. Mateus, J. *et al.* Selective and cross-reactive SARS-CoV-2 T cell epitopes in unexposed  
711 humans. *Science* (80-. ). eabd3871 (2020). doi:10.1126/science.abd3871
- 712 8. Ehrenfeld, M. *et al.* Covid-19 and autoimmunity. *Autoimmunity Reviews* **19**, (2020).
- 713 9. Gruber, C. *et al.* Mapping Systemic Inflammation and Antibody Responses in Multisystem  
714 Inflammatory Syndrome in Children (MIS-C). *Cell* (2020). doi:10.1016/j.cell.2020.09.034

- 715 10. Bastard, P. *et al.* Auto-antibodies against type I IFNs in patients with life-threatening  
716 COVID-19. *Science (80-. )*. **370**, (2020).
- 717 11. Kreye, J., Reincke, S. M. & Prüss, H. Do cross-reactive antibodies cause neuropathology  
718 in COVID-19? *Nature Reviews Immunology* (2020). doi:10.1038/s41577-020-00458-y
- 719 12. Guilmot, A. *et al.* Immune-mediated neurological syndromes in SARS-CoV-2-infected  
720 patients. *J. Neurol.* (2020). doi:10.1007/s00415-020-10108-x
- 721 13. Belongia, E. A. & Osterholm, M. T. COVID-19 and flu, a perfect storm. *Science* (2020).  
722 doi:10.1126/science.abd2220
- 723 14. Servick, K. Coronavirus creates a flu season guessing game. *Science* **369**, 890–891  
724 (2020).
- 725 15. Marshall, M. The lasting misery of coronavirus long-haulers. *Nature* **585**, (2020).
- 726 16. Nath, A. Long-Haul COVID. *Neurology* **95**, 559–560 (2020).
- 727 17. Perego, E. *et al.* Why the Patient-Made Term ‘Long Covid’ is needed. *Wellcome Open*  
728 *Res.* **5**, (2020).
- 729 18. Ibarondo, F. J. *et al.* Rapid Decay of Anti–SARS-CoV-2 Antibodies in Persons with Mild  
730 Covid-19. *N. Engl. J. Med.* (2020). doi:10.1056/nejmc2025179
- 731 19. Edridge, A. W. D. *et al.* Seasonal coronavirus protective immunity is short-lasting. *Nat.*  
732 *Med.* (2020). doi:10.1038/s41591-020-1083-1
- 733 20. Shaman, J. & Galanti, M. Will SARS-CoV-2 become endemic? *Science (80-. )*. (2020).  
734 doi:10.1126/science.abe5960
- 735 21. Kissler, S. M., Tedijanto, C., Goldstein, E., Grad, Y. H. & Lipsitch, M. Projecting the  
736 transmission dynamics of SARS-CoV-2 through the postpandemic period. *Science (80-. )*.

- 737           **368**, 860–868 (2020).
- 738   22.   Long, Q. X. *et al.* Antibody responses to SARS-CoV-2 in patients with COVID-19. *Nat.*  
739           *Med.* (2020). doi:10.1038/s41591-020-0897-1
- 740   23.   Wajnberg, A. *et al.* Robust neutralizing antibodies to SARS-CoV-2 infection persist for  
741           months. *Science (80-. )*. (2020). doi:10.1126/science.abd7728
- 742   24.   Shrock, E. *et al.* Viral epitope profiling of COVID-19 patients reveals cross-reactivity and  
743           correlates of severity. *Science (80-. )*. (2020). doi:10.1126/science.abd4250
- 744   25.   Li, Y. *et al.* Linear epitopes of SARS-CoV-2 spike protein elicit neutralizing antibodies in  
745           COVID-19 patients. *Cellular and Molecular Immunology* **17**, 1095–1097 (2020).
- 746   26.   Kamath, K. *et al.* Antibody epitope repertoire analysis enables rapid antigen discovery  
747           and multiplex serology. *Sci. Rep.* **10**, 1–9 (2020).
- 748   27.   Pantazes, R. J. *et al.* Identification of disease-specific motifs in the antibody specificity  
749           repertoire via next-generation sequencing. *Sci. Rep.* **6**, (2016).
- 750   28.   Haynes, W. A., Kamath, K., Daugherty, P. S. & Shon, J. C. Protein-based Immunome  
751           Wide Association Studies (PIWAS) for the discovery of significant disease-associated  
752           antigens. *bioRxiv* 2020.03.18.997759 (2020). doi:10.1101/2020.03.18.997759
- 753   29.   Marklund, E. *et al.* Serum-IgG responses to SARS-CoV-2 after mild and severe COVID-  
754           19 infection and analysis of IgG non-responders. *PLoS One* **15**, e0241104 (2020).
- 755   30.   Hu, W. T. *et al.* Antibody Profiles According to Mild or Severe SARS-CoV-2 Infection,  
756           Atlanta, Georgia, USA, 2020. *Emerg. Infect. Dis.* **26**, (2020).
- 757   31.   Benton, D. J. *et al.* Receptor binding and priming of the spike protein of SARS-CoV-2 for  
758           membrane fusion. *Nature* 1–8 (2020). doi:10.1038/s41586-020-2772-0

- 759 32. Wrobel, A. G. *et al.* SARS-CoV-2 and bat RaTG13 spike glycoprotein structures inform  
760 on virus evolution and furin-cleavage effects. *Nat. Struct. Mol. Biol.* **27**, 763–767 (2020).
- 761 33. Anand, P., Puranik, A., Aravamudan, M., Venkatakrishnan, A. J. & Soundararajan, V.  
762 SARS-CoV-2 strategically mimics proteolytic activation of human ENaC. *Elife* (2020).  
763 doi:10.7554/eLife.58603
- 764 34. Hachim, A. *et al.* ORF8 and ORF3b antibodies are accurate serological markers of early  
765 and late SARS-CoV-2 infection. *Nat. Immunol.* **21**, (2020).
- 766 35. Young, B. E. *et al.* Effects of a major deletion in the SARS-CoV-2 genome on the severity  
767 of infection and the inflammatory response: an observational cohort study. *Lancet* **396**,  
768 603–611 (2020).
- 769 36. Elbe, S. & Buckland-Merrett, G. Data, disease and diplomacy: GISAID’s innovative  
770 contribution to global health. *Glob. Challenges* **1**, 33–46 (2017).
- 771 37. Shu, Y. & McCauley, J. GISAID: Global initiative on sharing all influenza data – from  
772 vision to reality. *Eurosurveillance* (2017). doi:10.2807/1560-7917.ES.2017.22.13.30494
- 773 38. Poh, C. M. *et al.* Two linear epitopes on the SARS-CoV-2 spike protein that elicit  
774 neutralising antibodies in COVID-19 patients. *Nat. Commun.* (2020). doi:10.1038/s41467-  
775 020-16638-2
- 776 39. Wang, X. *et al.* Neutralizing Antibody Responses to Severe Acute Respiratory Syndrome  
777 Coronavirus 2 in Coronavirus Disease 2019 Inpatients and Convalescent Patients. *Clin.*  
778 *Infect. Dis.* (2020). doi:10.1093/cid/ciaa721
- 779 40. Zhang, L. *et al.* Antibody responses against SARS coronavirus are correlated with  
780 disease outcome of infected individuals. *J. Med. Virol.* **78**, 1–8 (2006).
- 781 41. Schaedel, C. *et al.* Lung symptoms in pseudohypoaldosteronism type 1 are associated

- 782 with deficiency of the  $\alpha$ -subunit of the epithelial sodium channel. *J. Pediatr.* **135**, 739–745  
783 (1999).
- 784 42. Geller, D. S. *et al.* Autosomal dominant pseudohypoaldosteronism type 1: Mechanisms,  
785 evidence for neonatal lethality, and phenotypic expression in adults. *J. Am. Soc. Nephrol.*  
786 **17**, 1429–1436 (2006).
- 787 43. Gentzsch, M. & Rossier, B. C. A Pathophysiological Model for COVID-19: Critical  
788 Importance of Transepithelial Sodium Transport upon Airway Infection. *Function* **1**,  
789 (2020).
- 790 44. Qiao, B. & De La Cruz, M. O. Enhanced binding of SARS-CoV-2 spike protein to receptor  
791 by distal polybasic cleavage sites. *ACS Nano* **14**, 10616–10623 (2020).
- 792 45. Zhang, Y. *et al.* Coagulopathy and Antiphospholipid Antibodies in Patients with Covid-19.  
793 *N. Engl. J. Med.* (2020). doi:10.1056/nejmc2007575
- 794 46. Zhang, Y. *et al.* The ORF8 Protein of SARS-CoV-2 Mediates Immune Evasion through  
795 Potently Downregulating MHC-I. *bioRxiv* (2020). doi:10.1101/2020.05.24.111823
- 796 47. Anderson, E. M. *et al.* Seasonal human coronavirus antibodies are boosted upon SARS-  
797 CoV-2 infection but not associated with protection. *medRxiv* **7**, 2020.11.06.20227215  
798 (2020).
- 799 48. Ng, K. W. *et al.* Preexisting and de novo humoral immunity to SARS-CoV-2 in humans.  
800 *Science* (80-. ). eabe1107 (2020). doi:10.1126/science.abe1107
- 801 49. Poston, D. *et al.* Absence of SARS-CoV-2 neutralizing activity in pre-pandemic sera from  
802 individuals with recent seasonal coronavirus infection. *medRxiv* (2020).  
803 doi:10.1101/2020.10.08.20209650
- 804 50. Wang, L. *et al.* Importance of Neutralizing Monoclonal Antibodies Targeting Multiple



- 805 Antigenic Sites on the Middle East Respiratory Syndrome Coronavirus Spike  
806 Glycoprotein To Avoid Neutralization Escape. *J. Virol.* (2018). doi:10.1128/jvi.02002-17
- 807 51. Sui, J. *et al.* Effects of Human Anti-Spike Protein Receptor Binding Domain Antibodies on  
808 Severe Acute Respiratory Syndrome Coronavirus Neutralization Escape and Fitness. *J.*  
809 *Virology* **88**, 13769–13780 (2014).
- 810 52. Coughlin, M. M. & Prabhakar, B. S. Neutralizing human monoclonal antibodies to severe  
811 acute respiratory syndrome coronavirus: target, mechanism of action, and therapeutic  
812 potential. *Rev. Med. Virol.* **22**, 2–17 (2012).
- 813 53. Hansen, J. *et al.* Studies in humanized mice and convalescent humans yield a SARS-  
814 CoV-2 antibody cocktail. *Science (80-. )*. **369**, 1010–1014 (2020).
- 815 54. Baum, A. *et al.* Antibody cocktail to SARS-CoV-2 spike protein prevents rapid mutational  
816 escape seen with individual antibodies. *Science (80-. )*. **369**, 1014–1018 (2020).
- 817 55. Yurkovetskiy, L. *et al.* SARS-CoV-2 Spike protein variant D614G increases infectivity and  
818 retains sensitivity to antibodies that target the receptor binding domain. *bioRxiv* (2020).  
819 doi:10.1101/2020.07.04.187757
- 820 56. Walls, A. C. *et al.* Structure, Function, and Antigenicity of the SARS-CoV-2 Spike  
821 Glycoprotein. *Cell* (2020). doi:10.1016/j.cell.2020.02.058
- 822 57. Fernández, A. Structural Impact of Mutation D614G in SARS-CoV-2 Spike Protein:  
823 Enhanced Infectivity and Therapeutic Opportunity. *ACS Medicinal Chemistry Letters* **11**,  
824 1667–1670 (2020).
- 825 58. Hu, J. *et al.* The D614G mutation of SARS-CoV-2 spike protein enhances viral infectivity  
826 and decreases neutralization sensitivity to individual convalescent sera. *bioRxiv* (2020).
- 827 59. Zhang, L. *et al.* The D614G mutation in the SARS-CoV-2 spike protein reduces S1

- 828 shedding and increases infectivity. *bioRxiv Prepr. Serv. Biol.* (2020).  
829 doi:10.1101/2020.06.12.148726
- 830 60. Chen, J., Wang, R., Wang, M. & Wei, G. W. Mutations Strengthened SARS-CoV-2  
831 Infectivity. *J. Mol. Biol.* **432**, 5212–5226 (2020).
- 832 61. UniProt: the universal protein knowledgebase. *Nucleic Acids Res.* **45**, D158–D169  
833 (2017).
- 834 62. Sanner, M. F., Olson, A. J. & Spehner, J. C. Reduced surface: An efficient way to  
835 compute molecular surfaces. *Biopolymers* **38**, 305–320 (1996).
- 836 63. Huang, J., Gutteridge, A., Honda, W. & Kanehisa, M. MIMOX: A web tool for phage  
837 display based epitope mapping. *BMC Bioinformatics* (2006). doi:10.1186/1471-2105-7-  
838 451
- 839 64. Mayrose, I. *et al.* Pepitope: Epitope mapping from affinity-selected peptides.  
840 *Bioinformatics* (2007). doi:10.1093/bioinformatics/btm493
- 841 65. Berman, H. M. *et al.* The Protein Data Bank. *Nucleic Acids Research* **28**, 235–242  
842 (2000).
- 843 66. Burley, S. K. *et al.* RCSB Protein Data Bank: Biological macromolecular structures  
844 enabling research and education in fundamental biology, biomedicine, biotechnology and  
845 energy. *Nucleic Acids Res.* **47**, D464–D474 (2019).
- 846 67. Hamelryck, T. & Manderick, B. PDB file parser and structure class implemented in  
847 Python. *Bioinformatics* (2003). doi:10.1093/bioinformatics/btg299
- 848 68. Cock, P. J. A. *et al.* Biopython: Freely available Python tools for computational molecular  
849 biology and bioinformatics. *Bioinformatics* **25**, 1422–1423 (2009).

- 850 69. DeLano, W. L. Pymol: An open-source molecular graphics tool. *CCP4 Newsl. Protein*  
851 *Crystallogr.* (2002).
- 852 70. Tibshirani, R. & Hastie, T. Outlier sums for differential gene expression analysis.  
853 *Biostatistics* **8**, 2–8 (2007).
- 854 71. Murtagh, F. & Legendre, P. Ward’s Hierarchical Agglomerative Clustering Method: Which  
855 Algorithms Implement Ward’s Criterion? *J. Classif.* (2014). doi:10.1007/s00357-014-  
856 9161-z
- 857 72. Madeira, F. *et al.* The EMBL-EBI search and sequence analysis tools APIs in 2019.  
858 *Nucleic Acids Res.* (2019). doi:10.1093/nar/gkz268
- 859
- 860
- 861
- 862
- 863
- 864
- 865
- 866
- 867
- 868
- 869
- 870
- 871
- 872
- 873
- 874
- 875
- 876
- 877
- 878
- 879
- 880
- 881
- 882
- 883
- 884

885  
886  
887  
888  
889  
890  
891  
892

**Table 1: SARS-CoV-2 cohorts used for epitope motif discovery**

| SARS-CoV-2 Cohorts   |         |                    | Training    |              | Testing     |              | COVID-19 Test          |
|----------------------|---------|--------------------|-------------|--------------|-------------|--------------|------------------------|
|                      |         |                    | # of Donors | # of Samples | # of Donors | # of Samples |                        |
| Cohort I             | Yale    | Inpatient          | 91          | 153          | 98          | 177          | NAT and/or serology    |
|                      |         | Healthcare Workers | 4           | 4            | 6           | 9            | NAT and/or serology    |
|                      |         | Outpatient         | 4           | 4            | 5           | 5            | Serology or symptoms   |
| Cohort II            | LabCorp | Inpatient          |             |              | 188         | 235          | NAT                    |
|                      |         | Outpatient         |             |              | 10          | 10           | Serology               |
| Cohort III           | SBCH    | In and Outpatient  |             |              | 73          | 82           | NAT, Serology          |
| Cohort IV            | BioIVT  | In and Outpatient  |             |              | 21          | 21           | Serology (20), NAT (1) |
| Cohort V             | BCA     | Asymptomatic/Mild  |             |              | 79          | 79           | Serology/SERA          |
| <b>Total</b>         |         |                    | <b>99</b>   | <b>161</b>   | <b>480</b>  | <b>618</b>   |                        |
| Prepandemic Controls |         | IgG                | 497         | 497          | 1500        | 1500         |                        |
|                      |         | IgM                | 430         | 430          | 1498        | 1498         |                        |

893

894  
895  
896  
897  
898  
899  
900  
901  
902  
903  
904  
905  
906  
907  
908  
909  
910  
911

912  
913  
914  
915  
916  
917

918 **Table 2: SERA SARS-CoV-2 IgG or IgM panel sensitivity as compared with various**  
919 **ELISAs in NAT positive subjects**

| Cohort  | Serological Test                | n   | SERA Sensitivity | ELISA Sensitivity |
|---------|---------------------------------|-----|------------------|-------------------|
|         |                                 |     | (% 95% CI)       | (% 95% CI)        |
| Yale    | Spike S1 IgG and IgM ELISA      | 315 | 77 [71.8 - 81.1] | 79 [73.8 - 82.9]  |
| LabCorp | Eurolmun S1 ELISA (IgG)         | 235 | 82 [76.7 - 86.5] | 75 [69.4 - 80.4]  |
| LabCorp | N Antigen ELISA (IgG)           | 235 | 82 [76.7 - 86.5] | 86 [80.4 - 89.4]  |
| SBCH    | Spike S1 IgG and IgM ELISA      | 82  | 52 [41.8 - 62.9] | 48 [37.1 - 58.2]  |
| SBCH    | Nucleoprotein IgG and IgM ELISA | 82  | 52 [41.8 - 62.9] | 50 [39.4 - 60.6]  |

920  
921  
922  
923  
924  
925  
926  
927  
928  
929  
930  
931

932

933

934

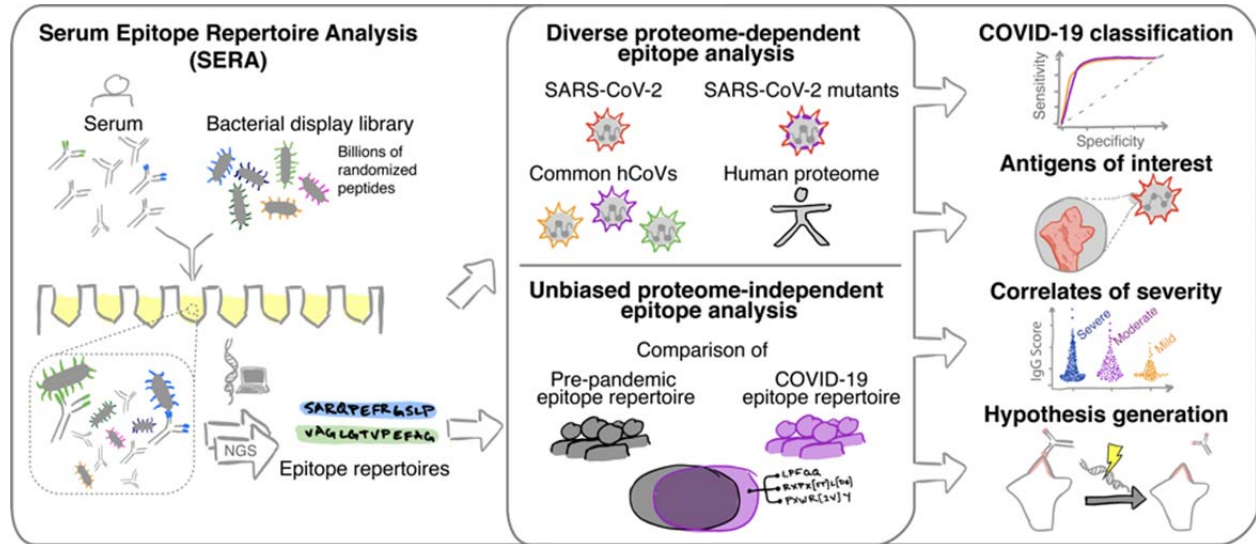

935

936

937

938

939

940

941

942

943

944

945

946

947

948

949

950

951

952

953

954

955

956

957

958

959

960

961

**Figure 1: The Serum Epitope Repertoire Analysis (SERA) platform enables high resolution mapping of SARS-CoV-2 antibody repertoires.** The SERA assay results in a set of approximately 1 million unique peptides, the “epitope repertoire”, for each individual. Repertoires were deposited in a database and compared with pre-pandemic controls to identify conserved epitopes in SARS-CoV-2 using proteome-dependent and -independent bioinformatic methods. SERA enables analysis of COVID-19 repertoires against any proteome including mutant SARS-CoV-2 strains, human common coronaviruses and the human proteome for discovery of potential autoantigens. The identified epitope signatures can be used to build diagnostic classifiers, to identify correlates of disease severity, and to develop hypotheses based on cases with specific symptoms and/or disease course (neurological, GI, cardio e.g.).

962  
963

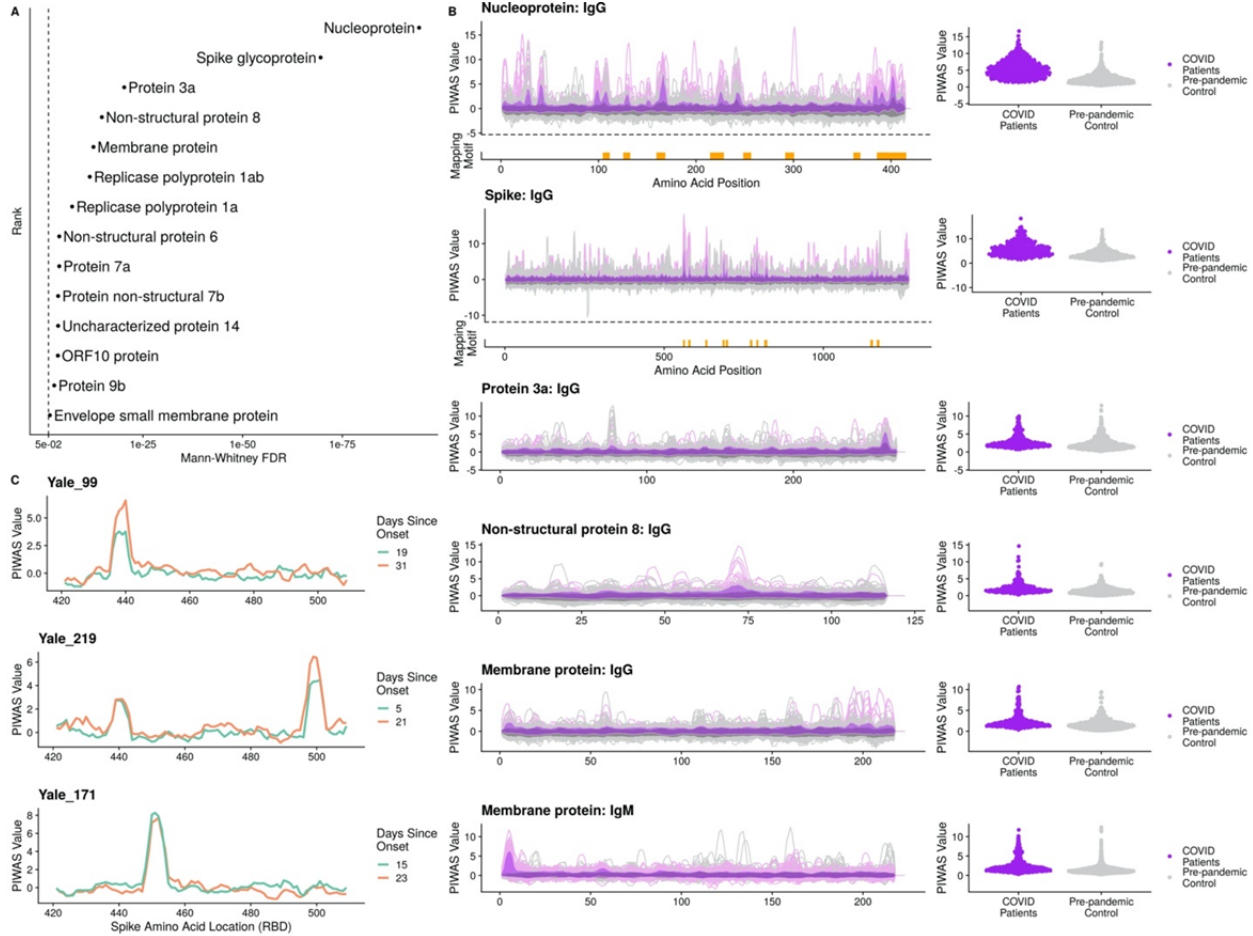

964

965 **Figure 2: Bioinformatic analysis of SERA antibody repertoires identifies the antigens and**  
966 **epitopes involved in the SARS-CoV-2 immune response. (A)** PIWAS statistical ranking  
967 of kmer enrichments across the SARS-CoV-2 proteome using the Mann-Whitney false  
968 discovery rate (FDR). Multiple antigens in addition to spike and nucleoprotein showed significant  
969 enrichment for one or more epitopes. **(B)** PIWAS kmer enrichments from COVID-19 repertoires  
970 versus pre-pandemic controls across statistically significant antigens. PIWAS values = number  
971 of standard deviations above the mean of 1500 pre-pandemic controls. IMUNE motifs largely  
972 mapped to the same epitopes that were identified by PIWAS. Epitopes on spike  
973 and nucleoprotein discovered by IMUNE are shown below each antigen (orange bars).  
974 **(C)** Longitudinal samples from individual subjects enabled identification of RBD-specific signals  
975 that emerged over time but were not conserved across COVID-19 patients.

976  
977  
978  
979  
980  
981  
982

983  
984

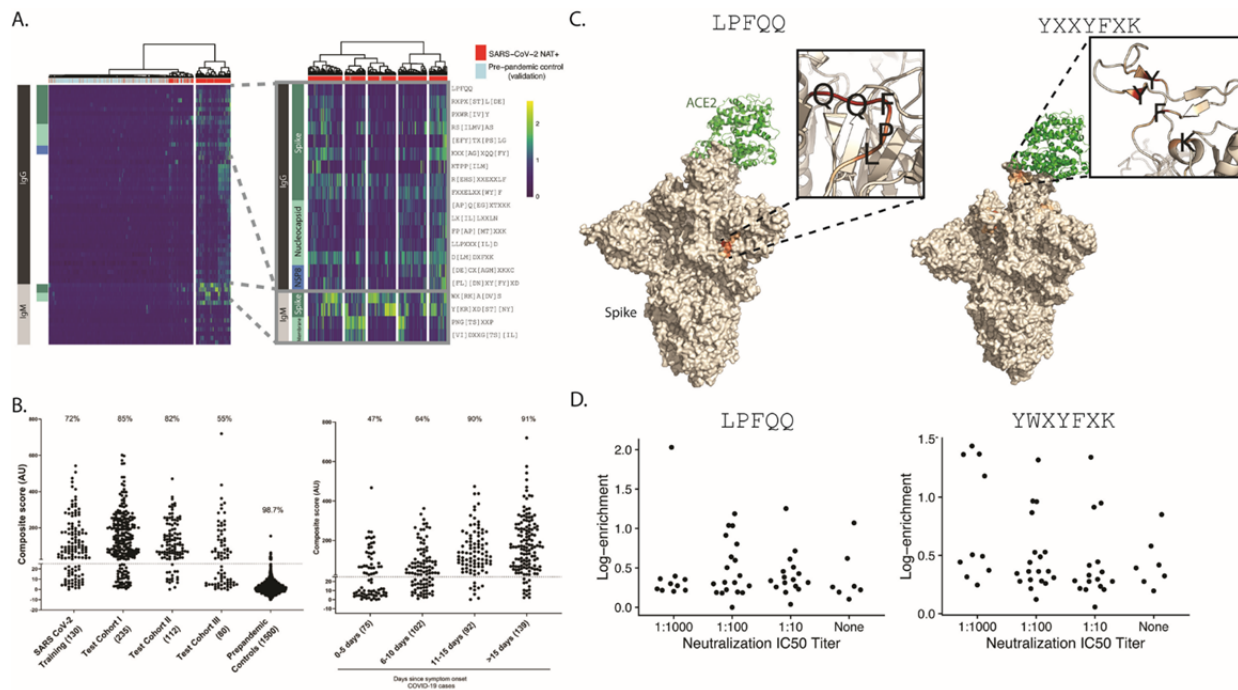

985

986 **Figure 3: IMUNE-based discovery of IgG and IgM motifs in the SARS-CoV-2 humoral**  
 987 **immune response. (A)** Heatmap of IgG and IgM motif log-enrichment values for 579 COVID-19  
 988 samples and 1500 pre-pandemic controls. Inset highlights motifs with linear epitope maps to  
 989 SARS-CoV-2. **(B)** Sensitivity and specificity of the SARS-CoV-2 IgG/IgM diagnostic classifier  
 990 in NAT+ subjects and pre-pandemic controls. Z-scores for each motif were summed to generate  
 991 an IgG/IgM composite score. The maximum value for the IgG or IgM for each sample is  
 992 shown. Samples above a cutoff of 25 are classified as positive. The sensitivity or specificity of  
 993 the SERA panels for all COVID-19 cohorts and controls is shown above each column. **(C)**  
 994 Candidate structural mappings for the linear motif LFPQQ and non-mapping motif YWXYFXK  
 995 (through its related variant YXXYFXK). Inset highlights the key contact amino acid residues for  
 996 the proposed structural localizations of the motifs. (PDB codes: 7A95 and 6ZGG  
 997 respectively). **(D)** Neutralization titer vs. log-enrichment for each motif (LFPQQ and YWXYFXK)  
 998 shows that samples with the highest enrichment for either motif tend to have higher titer  
 999 neutralization activity.

1000  
1001  
1002  
1003  
1004  
1005  
1006  
1007



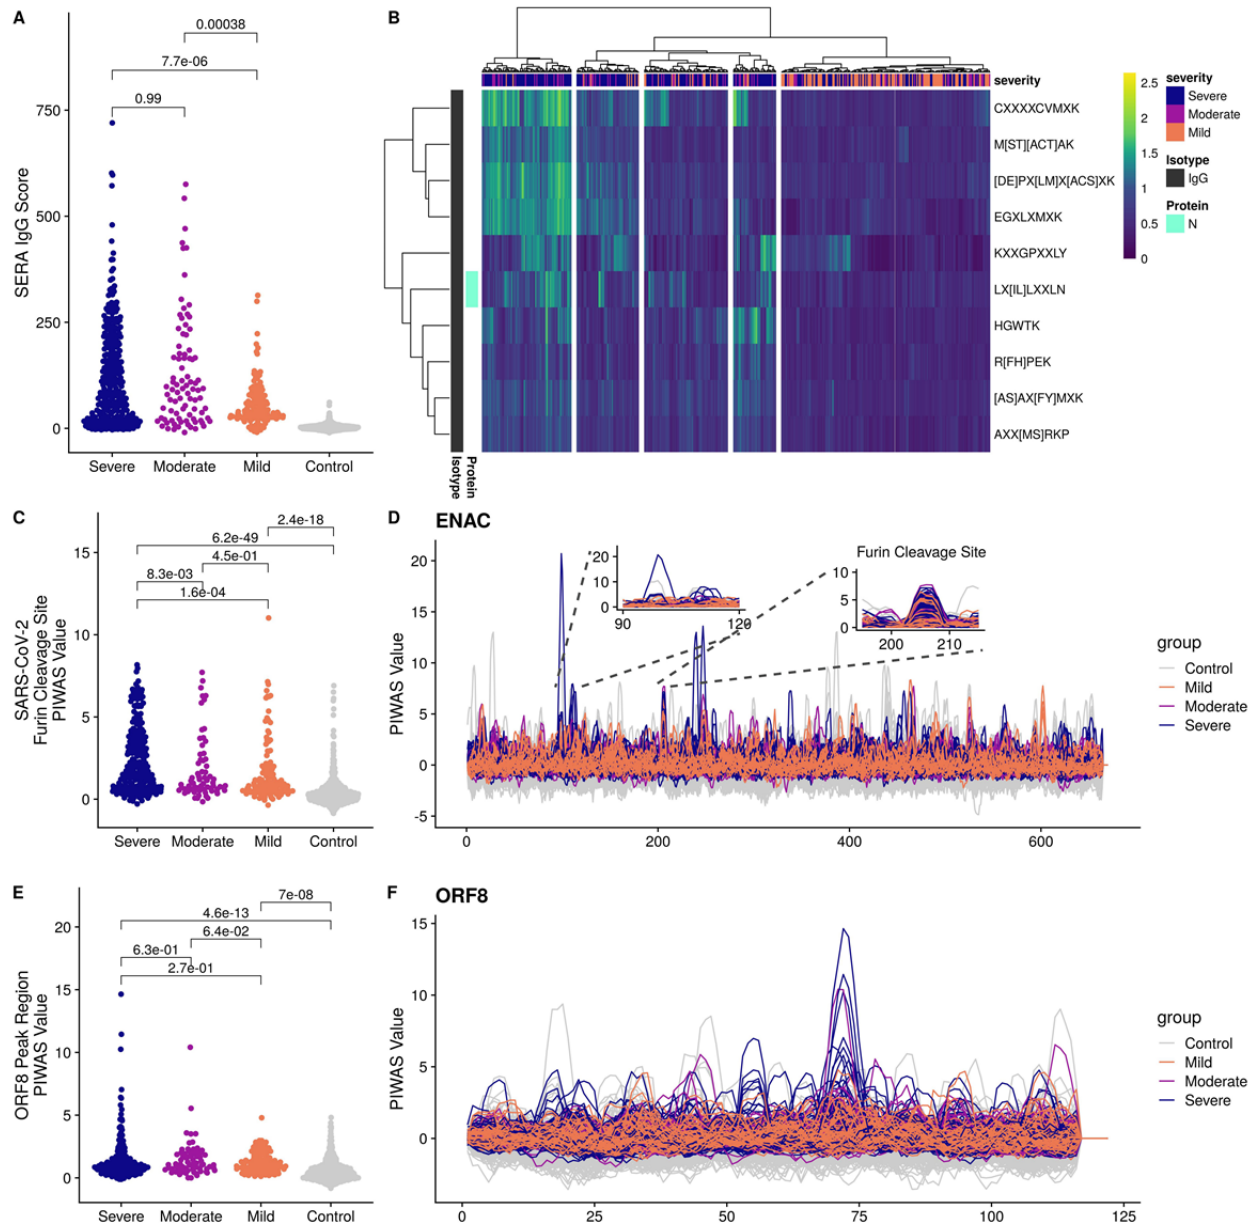

1008

1009 **Figure 4: Significantly different epitope signals are observed in mild, moderate, and**  
 1010 **severe cases of COVID-19. (A)** Comparison of SERA total IgG motif panel scores for severe,  
 1011 moderate, and mild cases based on motifs used in the diagnostic panel (Figure 3). Colors  
 1012 indicate disease severity. **(B)** Severe, moderate, and mild cases of SARS-CoV-2 are clustered  
 1013 based on log-enrichment of the top 10 motifs identified by a t-test comparison of severe and  
 1014 mild patients. **(C)** Distribution of PIWAS values at SARS-CoV-2 furin cleavage site for severe,  
 1015 moderate, and mild cases. **(D)** PIWAS tiling data is shown for the human ENaC- $\alpha$  protein. Insets  
 1016 highlight the furin cleavage site with homology to spike (right) and a non-homologous region of  
 1017 ENaC- $\alpha$  (left). **(E)** Distribution of PIWAS values for the peak epitope in ORF8 for severe,  
 1018 moderate, and mild cases. **(F)** PIWAS tiling of individual samples on the entire ORF8 sequence.  
 1019 All p-values were calculated using outlier sum statistical test.

It is made available under a [CC-BY-NC-ND 4.0 International license](https://creativecommons.org/licenses/by-nc-nd/4.0/).

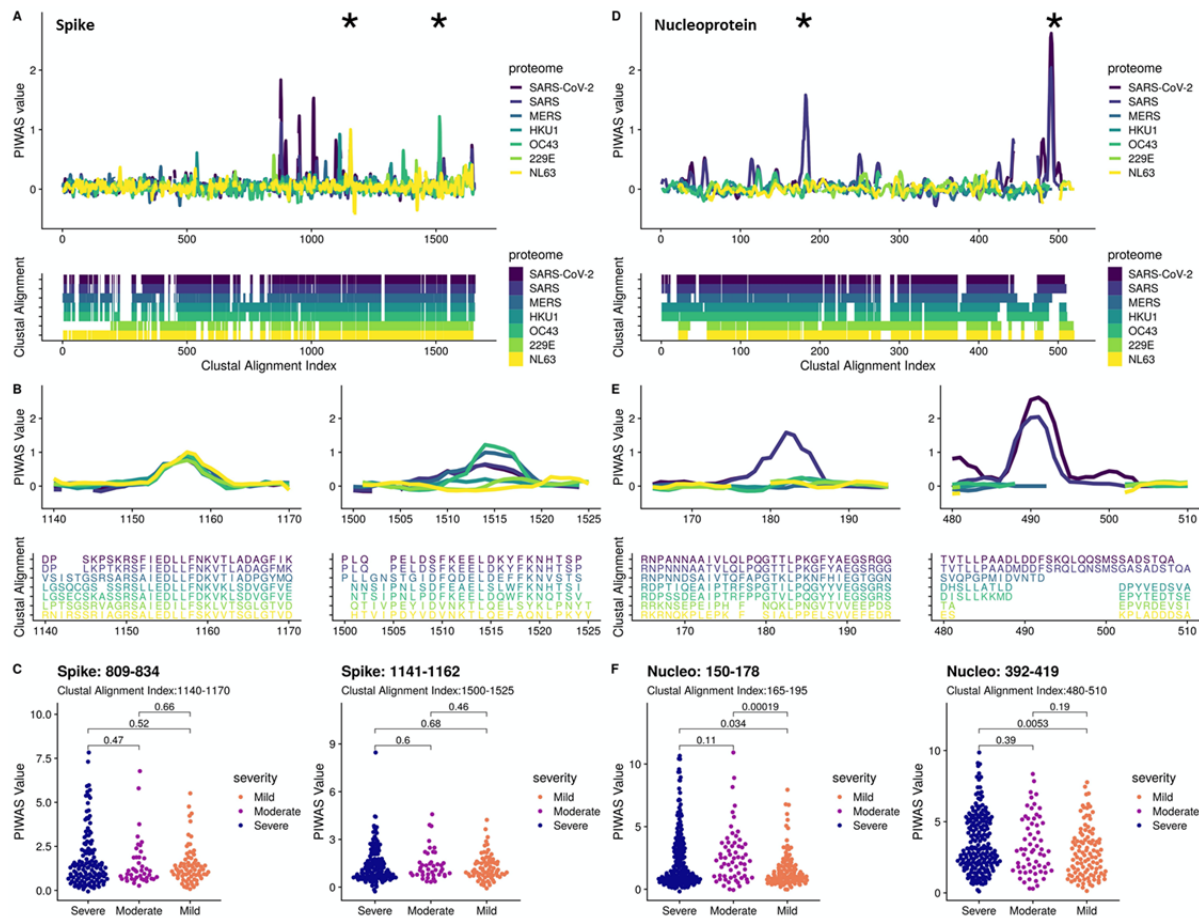

1020

1021 **Figure 5: Cross-reactivity analysis across coronaviruses reveals shared epitopes and**  
 1022 **epitopes specific to SARS-CoV-2.** PIWAS was performed using COVID-19 samples against  
 1023 various coronavirus proteomes including SARS-CoV-2, SARS, MERS, and the common hCoV-  
 1024 HKU1, OC43, 229E, and NL63. PIWAS tilings for (A) spike and (D) nucleoprotein revealed  
 1025 regions of cross-reactivity as well as epitopes only observed against SARS-CoV-2. Clustal  
 1026 multiple sequence alignments were performed and visualized below to depict sequence  
 1027 similarity and divergence. Distinct epitopes from (B) spike and (E) nucleoprotein showcase  
 1028 PIWAS values across the coronaviruses with corresponding clustal alignment sequences below.  
 1029 Epitope locations are denoted with asterisks in (A) and (D). Distribution of PIWAS values at  
 1030 epitopes from spike (C) and nucleoprotein (F) for severe, moderate, and mild cases, with p-  
 1031 values from Wilcoxon-rank sum test.

1032

1033

1034

1035

1036

1037

1038

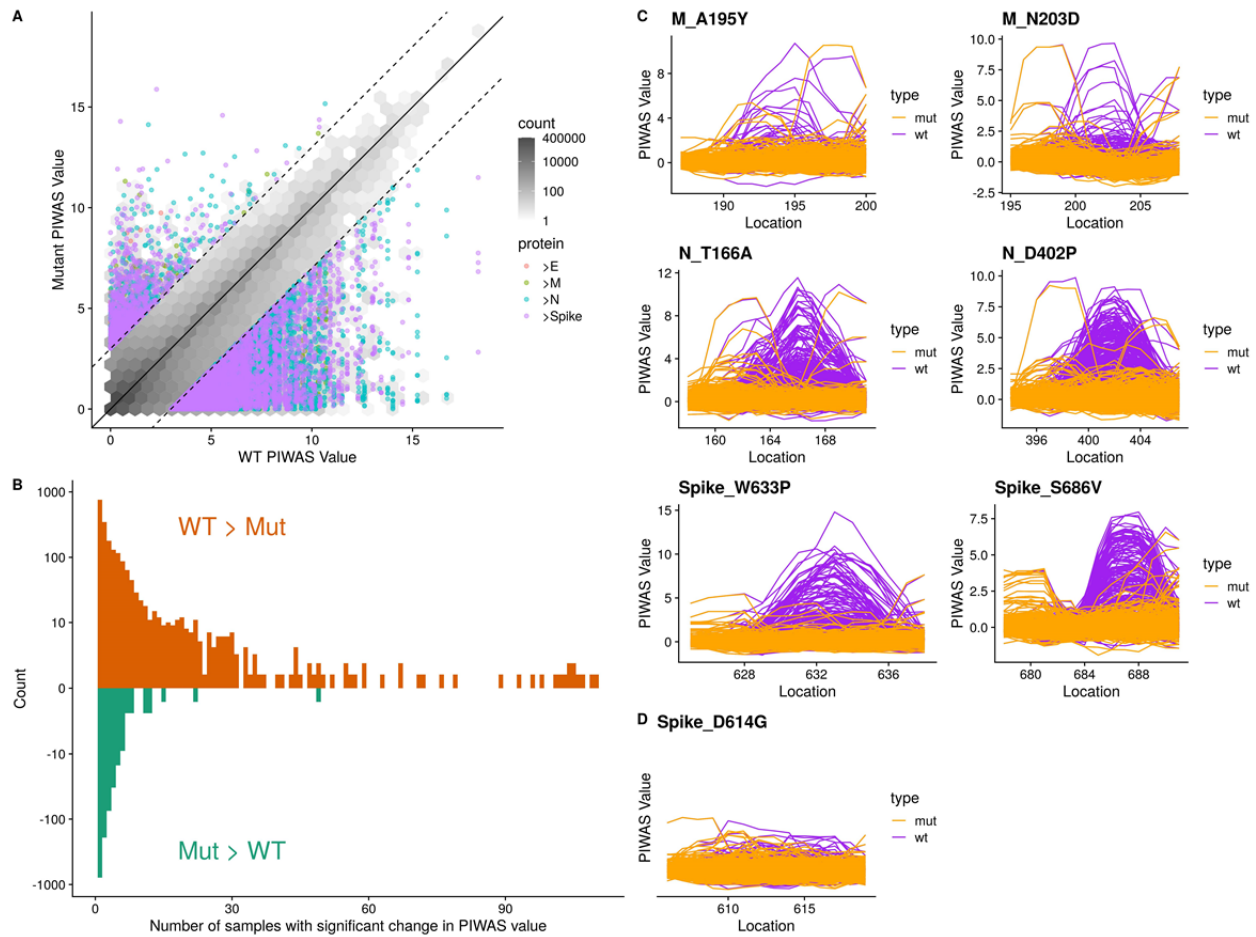

1039

1040 **Figure 6: Mutations to SARS-CoV-2 are biased towards decreasing immune epitope**  
1041 **response.** 21,127 distinct amino acid mutations in spike glycoprotein, nucleoprotein, envelope  
1042 protein, and membrane protein in SARS-CoV-2 strains were identified from sequencing data of  
1043 96,437 genomes from GISAID. **(A)** For each mutation, the PIWAS value of the wild-type (WT)  
1044 sequence was compared to the PIWAS value for the mutated strain (mut). **(B)** Mutations  
1045 conferring a significant PIWAS value change ( $|PIWAS_{WT} - PIWAS_{mut}| > 3$ ) for each COVID-19  
1046 sample were identified. For each mutation, the number of patients with a significant difference  
1047 was counted. **(C)** Exemplary mutations that yielded a decrease in PIWAS values are shown for  
1048 membrane protein (top row), nucleoprotein (middle row), and spike (bottom row). **(D)** No  
1049 significant immune signal is seen at location 614 of spike, for either the wild-type or the D614G  
1050 variant.

1051

1052
